# Supplementary material for: Target Metabolome Profiling-Based Machine Learning as a Diagnostic Approach for Cardiovascular Diseases in Adults
Source: MDPI journal article supplement (doi:10.3390/metabo12121185), 2022-11-27

## Validataion procedure of the developed metabolic profiling methods

Metabolite concentrations were calculated according to signal intensity of analytes and appropriate internal standards. Samples from the CAD, HTA and non-CVD groups were analyzed in the same batch. Validation of the developed metabolomic profiling methods was performed in accordance with the US FDA and EMA guidelines for bioanalytical method validation (EMA, 2019; USFDA, 2018). Validation procedure included assessment of the following parameters: selectivity, linearity, precision and accuracy, recovery, matrix effect, and stability. Isotopically labeled internal standards (ISTD) solution were applied as Quality control samples to monitor data enrichment and instrumental performance. Weighted (1/x) linear regression analysis included calculation of the R<sup>2</sup> value, slope, and intercept and was used to construct calibration curves. To assess the inter- and intra- assay precision and accuracy there were analyzed QC samples in six replicates through three analytical runs. Stability tests were performed in QC samples at low QC and high QC levels using working solutions of the analytes placed at room temperature ( $21 \pm 3$  °C), using biological samples placed in the autosampler at  $10 \pm 0.5$  °C for 24 hours; using biological samples at  $35 \pm 1$  °C during 20 days. Recovery and matrix effects were assessed in low- and high-level QC samples.

**Table S1.** LC-MS/MS parameters used for AA profiling

| Name        | Retention time | Precursor ion | Product ion | Cone | CE | Internal Standard |
|-------------|----------------|---------------|-------------|------|----|-------------------|
| Gly         | 1.21           | 76.0          | 30.0        | 17   | 10 | 13C215N-Gly       |
| 13C215N-Gly | 1.21           | 79.0          | 32.0        | 17   | 10 |                   |
| Ala         | 1.24           | 90            | 44          | 18   | 10 | D4-Ala            |
| D4-Ala      | 1.24           | 94            | 48          | 18   | 10 |                   |
| Pro         | 1.37           | 116.1         | 70.1        | 11   | 13 | D4-Ala            |
| Orn         | 1.08           | 133.1         | 70.1        | 18   | 20 | D6-Orn            |
| D6-Orn      | 1.08           | 139.1         | 76.1        | 18   | 20 |                   |
| Leu         | 2.94           | 132.1         | 86.1        | 17   | 10 | D3-Leu            |
| D3-Leu      | 2.91           | 135.1         | 89.1        | 17   | 10 |                   |
| ILe         | 2.68           | 132.1         | 86.1        | 17   | 10 | D3-Leu            |
| Val         | 1.5            | 118.1         | 72.1        | 19   | 13 | D8-Val            |
| D8-Val      | 1.5            | 126.1         | 80.1        | 19   | 13 |                   |
| Asp         | 1.26           | 134           | 116.1       | 20   | 13 | D3-Asp            |
| D3-Asp      | 1.26           | 137           | 119.1       | 20   | 13 |                   |
| Glu         | 1.29           | 148.1         | 130         | 20   | 13 | D5-Glu            |
| D5-Glu      | 1.29           | 153           | 135         | 20   | 13 |                   |
| Met         | 1.93           | 150.1         | 133         | 18   | 10 | D3-Met            |
| D3-Met      | 1.93           | 153.1         | 136         | 18   | 10 |                   |
| Phe         | 3.74           | 166.1         | 120.1       | 20   | 12 | D5-Phe            |
| D5-Phe      | 3.74           | 171           | 125         | 20   | 12 |                   |
| Arg         | 1.11           | 175.1         | 70.1        | 22   | 21 | D7-Arg            |
| D7-Arg      | 1.11           | 182           | 77          | 22   | 21 |                   |
| Cit         | 1.28           | 176.1         | 113.1       | 16   | 16 | D2-Cit            |
| D2-Cit      | 1.28           | 178.1         | 115.1       | 16   | 16 |                   |
| Tyr         | 2.47           | 182.1         | 136.1       | 20   | 13 | D4-Tyr            |
| D4-Tyr      | 2.47           | 186           | 140         | 20   | 13 |                   |
| Ser         | 1.22           | 106           | 60          | 20   | 13 | D4-Ala            |
| Thr         | 1.28           | 120           | 56          | 20   | 13 | D5-Phe            |
| Lys         | 1.08           | 147           | 84          | 20   | 13 | D4-Ala            |
| Trp         | 4.23           | 205           | 188         | 20   | 13 | D5-Phe            |
| His         | 1.10           | 156           | 110         | 20   | 13 | D4-Ala            |

**Table S2.** LC-MS/MS parameters used for ADMA and SDMA profiling

| Name    | Retention time | Precursor ion | Product ion | Cone | CE | Internal Standard |
|---------|----------------|---------------|-------------|------|----|-------------------|
| Arg     | 2.04           | 175.1         | 70.1        | 22   | 21 | D7-Arg            |
| D7-Arg  | 2.04           | 76.0          | 30.0        | 22   | 21 |                   |
| ADMA    | 3.76           | 203.2         | 46.1        | 22   | 21 | D7-Arg            |
| SDMA    | 3.53           | 203.2         | 172.1       | 22   | 21 | D7-Arg            |
| Choline | 2.85           | 60.1          | 104.1       | 22   | 21 | D7-Arg            |

**Table S3.** LC-MS/MS parameters used for AC profiling

| Analyte                      | Abbreviation | Precursor ion | Product ion | CE |
|------------------------------|--------------|---------------|-------------|----|
| Carnitine                    | C0           | 162           | 103         | 17 |
| Carnitine-D9                 | C0-ISTD      | 171           | 103         | 17 |
| Acetylcarnitine              | C2           | 204           | 85          | 18 |
| Acetylcarnitine-D3           | C2-ISTD      | 207           | 85          | 18 |
| Propionylcarnitine           | C3           | 218           | 85          | 19 |
| Propionylcarnitine -D3       | C3-ISTD      | 221           | 85          | 19 |
| Butyrylcarnitine             | C4           | 232           | 85          | 20 |
| Butyrylcarnitine-D3          | C4-ISTD      | 235           | 85          | 20 |
| Valerylcarnitine             | C5           | 246           | 85          | 20 |
| Valerylcarnitine-D9          | C5-ISTD      | 255           | 85          | 20 |
| Tiglylcarnitine              | C5:1         | 244           | 85          | 20 |
| Glutaryl carnitine           | C5-DC        | 276           | 85          | 20 |
| Hexanoylcarnitine            | C6           | 260           | 85          | 22 |
| Hexanoylcarnitine-D3         | C6-ISTD      | 263           | 85          | 22 |
| Octanoylcarnitine            | C8           | 288           | 85          | 24 |
| Octanoylcarnitine -D3        | C8-ISTD      | 291           | 85          | 24 |
| Octenoylcarnitine            | C8:1         | 286           | 85          | 24 |
| Decanoylcarnitine            | C10          | 316           | 85          | 26 |
| Decanoylcarnitine -D3        | C10-ISTD     | 319           | 85          | 26 |
| Decenoylcarnitine            | C10:1        | 314           | 85          | 26 |
| Decadienylcarnitine          | C10:2        | 312           | 85          | 26 |
| Dodecanoylcarnitine          | C12          | 344           | 85          | 27 |
| Dodecanoylcarnitine -D3      | C12-ISTD     | 347           | 85          | 27 |
| Dodecenoylcarnitine          | C12:1        | 342           | 85          | 27 |
| Tetradecadienylcarnitine     | C14:2        | 368           | 85          | 27 |
| Hexadecanoylcarnitine        | C16          | 400           | 85          | 28 |
| Hexadecanoylcarnitine -D3    | C16-ISTD     | 403           | 85          | 28 |
| Octadecanoylcarnitine        | C18          | 428           | 85          | 28 |
| Octadecanoylcarnitine -D3    | C18-ISTD     | 431           | 85          | 28 |
| Octadecenoylcarnitine        | C18:1        | 426           | 85          | 26 |
| Octadecadienylcarnitine      | C18:2        | 424           | 85          | 20 |
| Hydroxyvalerylcarnitine      | C5-OH        | 262           | 85          | 26 |
| Hydroxyhexadecenoylcarnitine | C16:1-OH     | 398           | 85          | 26 |
| Hydroxyoctadecenoylcarnitine | C18:1-OH     | 442           | 85          | 28 |

**Table S4.** LC-MS/MS parameters used for tryptophan metabolism profiling

| Analyte                       | RT, min | Registered ions |              | Fragmentor | CE     |
|-------------------------------|---------|-----------------|--------------|------------|--------|
|                               |         | Precursor ion   | Product ion  |            |        |
| 1-Methyltryptophan            | 4.2     | 219             | 146          | 90         | 20     |
| 3-Aminoisobutyric acid        | 2.3     | 104             | 57           | 90         | 15     |
| 3-Hydroxyanthranilic acid     | 5.1     | 154             | 136          | 90         | 10     |
| 3-Hydroxykynurenine           | 3.9     | 225             | 162; 110     | 90         | 22; 17 |
| 3-Hydroxyanthranilic-d3 acid  | 5.0     | 157             | 139.1        | 90         | 10     |
| 3-Hydroxykynurenine 13C2, 15N | 3.9     | 228.1           | 110.1        | 90         | 17     |
| 4-Aminobutyric acid           | 2.0     | 104             | 87; 69       | 90         | 10; 15 |
| 4-Aminobutyric-d6 acid        | 2.0     | 110.1           | 93.2; 73.2   | 90         | 10; 15 |
| 5-Hydroxytryptophan           | 5.4     | 221             | 204; 162     | 90         | 10; 20 |
| 5-Hydroxytryptophol           | 5.9     | 178             | 160          | 100        | 15     |
| 5-Methoxytryptamine           | 3.0     | 191             | 174          | 90         | 10     |
| 6-Hydroxymelatonin            | 6.5     | 249             | 190          | 110        | 15     |
| Acetylcholine                 | 5.2     | 146             | 87; 60; 43   | 90         | 15; 10 |
| Anthranilic acid              | 6.6     | 138.1           | 120.1; 92    | 95         | 10; 20 |
| Asparagine                    | 1.1     | 133             | 87; 74       | 100        | 20     |
| Aspartic acid                 | 1.1     | 134             | 87; 74       | 100        | 10; 15 |
| Biopterin                     | 2.5     | 238.1           | 194; 178     | 90         | 20     |
| Biopterin-d3                  | 2.5     | 241             | 194          | 90         | 20     |
| Choline                       | 2.2     | 104             | 60           | 90         | 20     |
| Citrulline                    | 1.3     | 176             | 113; 70      | 90         | 20; 30 |
| Cortisol                      | 7.3     | 363             | 327; 121     | 120        | 10; 20 |
| Dopamine                      | 4.8     | 154             | 119; 91      | 90         | 10     |
| Dopamine-d4                   | 4.9     | 158.1           | 123.1; 95.1  | 90         | 10; 30 |
| Epinephrine                   | 3.6     | 184             | 166; 151     | 90         | 5; 25  |
| Glutamic acid                 | 1.3     | 148             | 84; 56       | 100        | 15; 30 |
| Glutamine                     | 1.2     | 147             | 130; 84      | 100        | 10; 15 |
| HIAA                          | 6.1     | 192.1           | 146.1        | 100        | 20     |
| HIAA-d5                       | 6.2     | 197             | 150.1        | 100        | 20     |
| Homovanillic acid             | 6.3     | 181.1           | 137; 122     | 70         | 4; 16  |
| Indole-3-acetic acid          | 7.2     | 176.1           | 130.1        | 95         | 20     |
| Indole-3-acetic-d4 acid       | 7.2     | 180.1           | 133.1        | 95         | 20     |
| Indole-3-acrylic acid         | 7.3     | 188.1           | 170; 115     | 100        | 20; 25 |
| Indole-3-butyric acid         | 7.7     | 204.2           | 144.2; 130.1 | 100        | 25     |
| Indole-3-butyric-d4 acid      | 7.8     | 208             | 132          | 100        | 25     |
| Indole-3-carboxaldehyde       | 7.2     | 146.1           | 118.1; 91.1  | 95         | 15; 30 |
| Indole-3-carboxaldehyde-13C8  | 7.3     | 154.1           | 126.1; 98.1  | 95         | 30     |
| Indole-3-lactic acid          | 6.8     | 206.1           | 118.1        | 95         | 22     |
| Indole-3-lactic-d5 acid       | 6.9     | 211             | 122          | 95         | 22     |
| Indole-3-propionic acid       | 7.5     | 190.1           | 130.1        | 95         | 20     |
| Indole-3-propionic-d2 acid    | 7.6     | 192.1           | 130.1        | 95         | 20     |
| Kynurenine acid               | 7.1     | 190.1           | 144.1        | 95         | 20     |
| Kynurenine-d5 acid            | 6.7     | 195.1           | 149.1        | 95         | 30     |
| Kynurenine                    | 5.9     | 209.1           | 146; 94      | 95         | 30; 10 |
| Kynurenine-d4                 | 5.9     | 213             | 98.1         | 95         | 10     |
| L-DOPA                        | 3.0     | 198             | 181; 152     | 100        | 10     |
| L-Tryptophan                  | 7.3     | 203             | 142; 116     | 100        | 15     |
| L-Tryptophan-d5               | 6.7     | 208.3           | 164.3; 120.1 | 100        | 15     |
| Melatonin                     | 7.2     | 233             | 174          | 100        | 15     |
| Melatonin-d4                  | 7.2     | 237             | 178          | 120        | 10     |
| Metanephrine                  | 6.0     | 198             | 165; 148     | 90         | 20; 25 |
| N-acetyl-5-hydroxytryptamine  | 6.2     | 219             | 160          | 100        | 15     |
| Neopterin                     | 1.6     | 254.1           | 206.1; 190.1 | 100        | 20     |
| Neopterin-13C5                | 1.7     | 259             | 210          | 120        | 10     |
| N-methylserotonin             | 8.6     | 191             | 160          | 90         | 12     |
| Norepinephrine                | 2.5     | 152             | 107          | 110        | 20     |
| Normetanephrine               | 4.6     | 166             | 134          | 100        | 15     |
| Normetanephrine-d3            | 4.7     | 187.2           | 137.1        | 100        | 15     |
| Phenylalanine                 | 5.8     | 166             | 120          | 100        | 15     |

|                      |     |          |               |         |           |
|----------------------|-----|----------|---------------|---------|-----------|
| Quinolinic acid      | 2.7 | 168.1    | 106.1; 78.1   | 95      | 15; 30    |
| Quinolinic acid-d3   | 1.9 | 171.1    | 109.1; 81.1   | 95      | 15; 30    |
| Serotonin            | 7.3 | 177; 160 | 160; 132; 105 | 90; 120 | 7; 20; 30 |
| Serotonin-d4         | 7.5 | 181.1    | 164; 136      | 90; 120 | 7; 20     |
| Tryptamine           | 8.0 | 161.1    | 144.1; 115.1  | 95      | 10; 30    |
| Tryptophol           | 7.2 | 162.1    | 144.2         | 100     | 13        |
| Tyrosine             | 3.7 | 182      | 165; 136      | 90      | 5; 10     |
| Vanilylmandelic acid | 3.5 | 197      | 138; 137      | 100     | 10; 24    |
| Xanthurenic acid     | 6.7 | 206.1    | 160; 132.1    | 95      | 20; 30    |
| Xanthurenic-d4 acid  | 6.8 | 210.1    | 164.1; 136.1  | 95      | 20; 30    |

**Table S5.** Concentration (median and interquartile range)

| Metabolite      | Non-CVD |                | HTA    |                | CAD    |                |
|-----------------|---------|----------------|--------|----------------|--------|----------------|
|                 | Median  | Quartile range | Median | Quartile range | Median | Quartile range |
| Amino acids, uM |         |                |        |                |        |                |
| GABR            | 0.85    | 0.70 - 0.94    | 0.78   | 0.63 - 0.95    | 0.72   | 0.58 - 0.84    |
| Aor             | 1.39    | 1.04 - 1.53    | 1.27   | 1.00 - 1.52    | 1.13   | 0.85 - 1.25    |
| Fischer ratio   | 1.33    | 1.05 - 1.63    | 1.68   | 1.32 - 2.09    | 1.72   | 1.48 - 2.15    |
| Glycine         | 281     | 216.3 - 359.0  | 222.6  | 181.5 - 258.4  | 224.3  | 183.4 - 249.3  |
| Alanine         | 392     | 352.1 - 467.6  | 449.4  | 383.9 - 495.1  | 487.1  | 407.9 - 528.1  |
| Proline         | 117     | 97.2 - 162.1   | 134.2  | 104.2 - 182.9  | 160.9  | 127.3 - 182.3  |
| Valine          | 240     | 226.1 - 265.2  | 257.8  | 225.7 - 295.1  | 262.0  | 236.5 - 308.6  |
| Leucine         | 135.8   | 124.2 - 151.4  | 141.3  | 122.9 - 163.6  | 155.0  | 135.0 - 172.8  |
| Isoleucine      | 72.86   | 65.97 - 83.98  | 74.37  | 65.40 - 91.39  | 85.82  | 75.10 - 103.02 |
| Ornithine       | 62.57   | 53.77 - 86.33  | 73.81  | 66.31 - 85.81  | 81.95  | 66.62 - 102.28 |
| Aspartic acid   | 5.62    | 4.38 - 7.35    | 6.20   | 5.02 - 7.68    | 6.04   | 4.65 - 7.22    |
| Phenylalanine   | 69.83   | 62.65 - 75.48  | 74.60  | 66.23 - 84.16  | 80.91  | 76.66 - 90.09  |
| Arginine        | 86.38   | 77.00 - 100.25 | 94.87  | 79.82 - 105.46 | 91.67  | 80.76 - 101.55 |
| Citrulline      | 40.43   | 31.44 - 44.27  | 40.09  | 34.55 - 48.77  | 44.22  | 37.05 - 50.14  |
| Serine          | 99.69   | 83.86 - 120.16 | 91.90  | 79.87 - 108.06 | 94.90  | 83.66 - 106.29 |
| Threonine       | 110.37  | 97.64 - 114.29 | 98.71  | 84.97 - 108.96 | 100.48 | 87.24 - 115.22 |
| Lysine          | 76.34   | 67.49 - 87.11  | 82.61  | 75.31 - 92.66  | 89.37  | 74.54 - 96.41  |
| Tyrosine        | 67.37   | 55.98 - 76.09  | 75.19  | 63.20 - 84.61  | 77.13  | 67.42 - 83.82  |
| Methionine      | 18.95   | 15.703 - 21.39 | 18.95  | 16.38 - 20.91  | 21.33  | 18.18 - 23.95  |
| ADMA            | 0.38    | 0.31 - 0.45    | 0.43   | 0.37 - 0.49    | 0.46   | 0.39 - 0.51    |

|                               |        |                    |       |                  |       |                  |
|-------------------------------|--------|--------------------|-------|------------------|-------|------------------|
| ADMA/Arg                      | 0.0038 | 0.0033 -<br>0.005  | 0.00  | 0.00 - 0.01      | 0.00  | 0.00 -<br>0.01   |
| SDMA                          | 0.506  | 0.451 -<br>0.550   | 0.55  | 0.48 - 0.66      | 0.63  | 0.51 -<br>0.76   |
| Choline                       | 12.25  | 11.24 -<br>14.08   | 12.91 | 11.40 -<br>17.54 | 13.89 | 11.73 -<br>17.03 |
| Carnitine                     | 23.98  | 20.43 -<br>30.56   | 29.93 | 26.49 -<br>33.62 | 33.39 | 27.70 -<br>37.63 |
| Acylcarnitines, uM            |        |                    |       |                  |       |                  |
| Acetylcarnitine               | 21.84  | 19.91 -<br>24.69   | 26.99 | 23.10 -<br>33.17 | 27.23 | 21.82 -<br>33.18 |
| Propionylcarnitine            | 0.57   | 0.44 -<br>0.75     | 0.76  | 0.63 - 0.95      | 0.84  | 0.71 -<br>0.98   |
| Butyrylcarnitine              | 0.167  | 0.12 -<br>0.23     | 0.26  | 0.20 - 0.33      | 0.28  | 0.23 -<br>0.37   |
| Tiglylcarnitine               | 0.009  | 0.007 -<br>0.011   | 0.01  | 0.01 - 0.01      | 0.01  | 0.01 -<br>0.01   |
| Isovalerylcarnitine           | 0.079  | 0.054 -<br>0.094   | 0.09  | 0.08 - 0.11      | 0.11  | 0.09 -<br>0.13   |
| Hexanoylcarnitine             | 0.044  | 0.037 -<br>0.056   | 0.06  | 0.05 - 0.07      | 0.06  | 0.05 -<br>0.08   |
| Hydroxyisovalerylcarnitine    | 0.009  | 0.006 -<br>0.011   | 0.01  | 0.01 - 0.01      | 0.01  | 0.01 -<br>0.01   |
| Glutaryl carnitine            | 0.131  | 0.108 -<br>0.172   | 0.13  | 0.11 - 0.17      | 0.15  | 0.13 -<br>0.18   |
| Octenoylcarnitine             | 0.028  | 0.023 -<br>0.037   | 0.04  | 0.03 - 0.05      | 0.03  | 0.03 -<br>0.05   |
| Octanoylcarnitine             | 0.152  | 0.103 -<br>0.185   | 0.16  | 0.13 - 0.21      | 0.18  | 0.13 -<br>0.23   |
| Adipoylcarnitine              | 0.008  | 0.007 -<br>0.013   | 0.01  | 0.01 - 0.01      | 0.02  | 0.01 -<br>0.02   |
| Decadienoylcarnitine          | 0.017  | 0.014 -<br>0.020   | 0.02  | 0.02 - 0.02      | 0.02  | 0.02 -<br>0.02   |
| Decenoylcarnitine             | 0.163  | 0.149 -<br>0.219   | 0.21  | 0.17 - 0.27      | 0.23  | 0.17 -<br>0.29   |
| Decanoylcarnitine             | 0.221  | 0.159 -<br>0.303   | 0.24  | 0.19 - 0.33      | 0.28  | 0.18 -<br>0.36   |
| Dodecenoylcarnitine           | 0.062  | 0.0451 -<br>0.071  | 0.07  | 0.06 - 0.09      | 0.08  | 0.05 -<br>0.10   |
| Dodecanoylcarnitine           | 0.062  | 0.044 -<br>0.080   | 0.07  | 0.06 - 0.09      | 0.07  | 0.05 -<br>0.10   |
| Tetradecadienoylcarnitine     | 0.032  | 0.026 -<br>0.038   | 0.04  | 0.03 - 0.05      | 0.04  | 0.03 -<br>0.05   |
| Tetradecenoylcarnitine        | 0.058  | 0.040 -<br>0.070   | 0.06  | 0.05 - 0.09      | 0.07  | 0.04 -<br>0.09   |
| Tetradecanoylcarnitine        | 0.022  | 0.017 -<br>0.027   | 0.03  | 0.02 - 0.03      | 0.03  | 0.02 -<br>0.03   |
| Hydroxytetradecanoylcarnitine | 0.003  | 0.002 -<br>0.004   | 0.00  | 0.00 - 0.01      | 0.00  | 0.00 -<br>0.01   |
| Hexadecenoylcarnitine         | 0.022  | 0.018 -<br>0.027   | 0.03  | 0.02 - 0.03      | 0.03  | 0.02 -<br>0.04   |
| Palmitoylcarnitine            | 0.089  | 0.077 -<br>0.105   | 0.10  | 0.10 - 0.12      | 0.11  | 0.09 -<br>0.13   |
| Hydroxyhexadecenoylcarnitine  | 0.045  | 0.038 -<br>0.051   | 0.04  | 0.03 - 0.05      | 0.04  | 0.04 -<br>0.05   |
| Hydroxyhexadecanoylcarnitine  | 0.002  | 0.0011 -<br>0.0018 | 0.00  | 0.00 - 0.00      | 0.00  | 0.00 -<br>0.00   |
| Linoleylcarnitine             | 0.047  | 0.037 -<br>0.058   | 0.05  | 0.04 - 0.07      | 0.06  | 0.05 -<br>0.08   |
| Oleoylecarnitine              | 0.091  | 0.076 -<br>0.104   | 0.10  | 0.09 - 0.13      | 0.11  | 0.08 -<br>0.13   |

|                                         |        |                    |        |                    |        |                     |
|-----------------------------------------|--------|--------------------|--------|--------------------|--------|---------------------|
| Stearoylcarnitine                       | 0.035  | 0.031 -<br>0.040   | 0.04   | 0.03 - 0.04        | 0.04   | 0.03 -<br>0.04      |
| Tryptophan metabolism intermediates, nM |        |                    |        |                    |        |                     |
| 5-Hydroxytryptophan                     | 0.021  | 0.015 -<br>0.031   | 0.02   | 0.01 - 0.02        | 0.02   | 0.01 -<br>0.02      |
| Kynurenine                              | 1204   | 981 -<br>1355      | 1312   | 1113 - 1504        | 1492   | 1301 -<br>1668      |
| Tryptophan                              | 49823  | 45366 -<br>55123   | 46827  | 41583 -<br>51495   | 45178  | 40862 -<br>49211    |
| Kyn/Trp                                 | 22.45  | 19.49 -<br>26.41   | 28.45  | 24.34 -<br>33.19   | 32.60  | 28.27 -<br>38.09    |
| Serotonin                               | 7.73   | 2.51 -<br>10.63    | 3.66   | 1.58 - 8.71        | 1.37   | 0.73 -<br>3.54      |
| Quinolinic acid                         | 53.31  | 42.69 -<br>77.86   | 72.16  | 58.46 -<br>100.57  | 74.80  | 59.29 -<br>107.27   |
| HIAA                                    | 0.012  | 0.010 -<br>0.015   | 0.01   | 0.01 - 0.02        | 0.02   | 0.01 -<br>0.02      |
| Tryptamine                              | 0.098  | 0.076 -<br>0.129   | 0.11   | 0.08 - 0.14        | 0.10   | 0.06 -<br>0.13      |
| Anthranillic acid                       | 7.889  | 4.845 -<br>10.056  | 10.36  | 6.65 - 15.09       | 11.03  | 6.98 -<br>15.43     |
| Xanthurenic acid                        | 0.016  | 0.010 -<br>0.032   | 0.02   | 0.01 - 0.03        | 0.02   | 0.01 -<br>0.03      |
| Indole-3-lactic acid                    | 359    | 254 - 459          | 357.93 | 301.54 -<br>503.12 | 411.37 | 315.25 -<br>505.56  |
| Indole-3-acetic acid                    | 341    | 200 - 572          | 581.39 | 346.12 -<br>786.62 | 728.28 | 462.21 -<br>1022.32 |
| Indole-3-carboxaldehyde                 | 12.37  | 4.92 -<br>17.74    | 12.77  | 5.53 - 18.09       | 16.31  | 13.13 -<br>20.10    |
| Indole-3-acrylic acid                   | 11.08  | 8.48 -<br>21.84    | 14.31  | 9.68 - 20.90       | 19.24  | 12.64 -<br>24.37    |
| Indole-3-propionic acid                 | 163.01 | 117.96 -<br>246.21 | 201.73 | 123.93 -<br>349.38 | 317.03 | 156.86 -<br>415.15  |
| Indole-3-butyric acid                   | 3.64   | 3.12 -<br>4.56     | 4.40   | 3.93 - 5.55        | 4.80   | 3.69 -<br>6.05      |
| Kynurenic acid                          | 13.36  | 10.34 -<br>16.21   | 14.47  | 11.27 -<br>19.83   | 18.06  | 14.52 -<br>20.99    |

**Figure S1.** Heatmap correlations matrices between plasma metabolites related to carnitine profiling and cardiometabolic risk factors by participant groups: a. Non-CVD (healthy) individuals; b. Patients with HTA; c. Patients with CAD.

A.

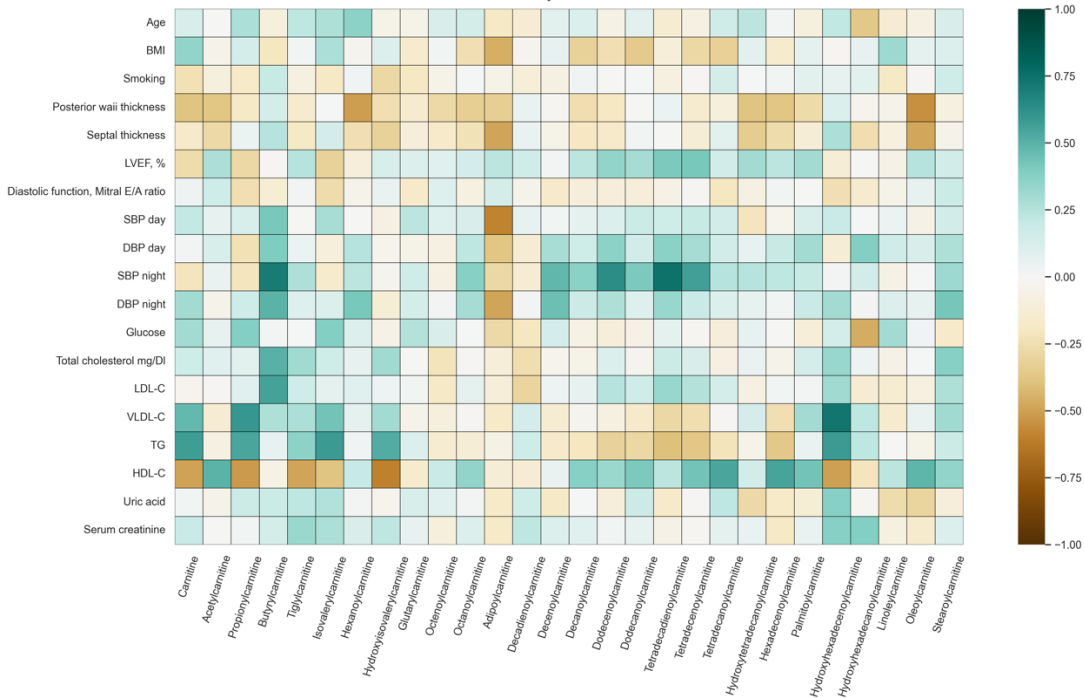

B

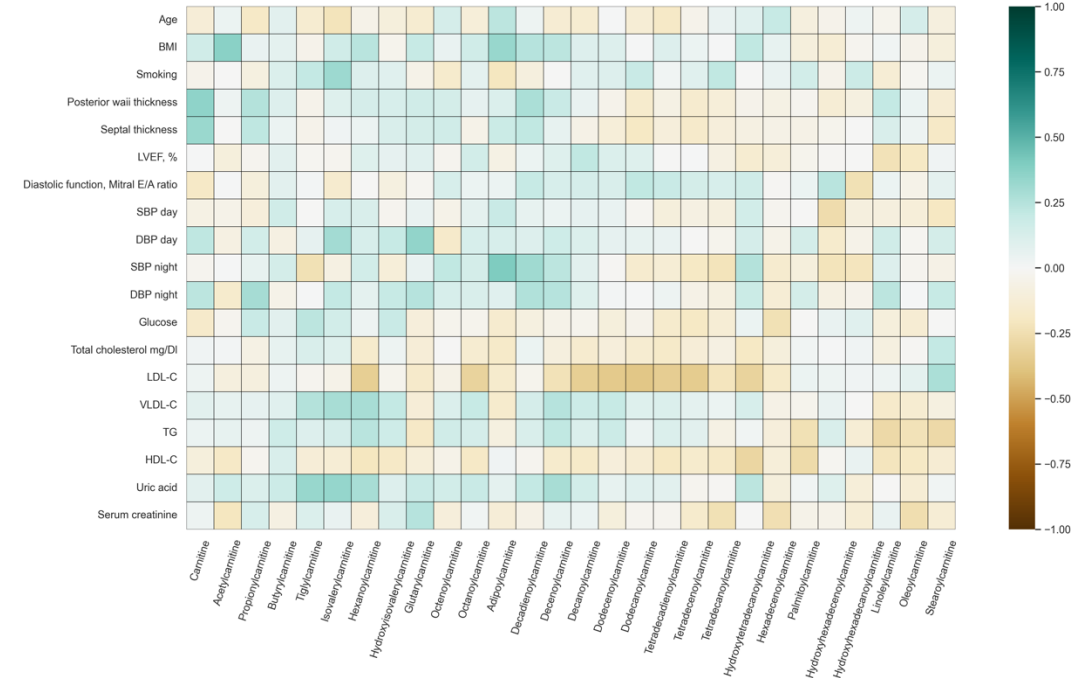

C

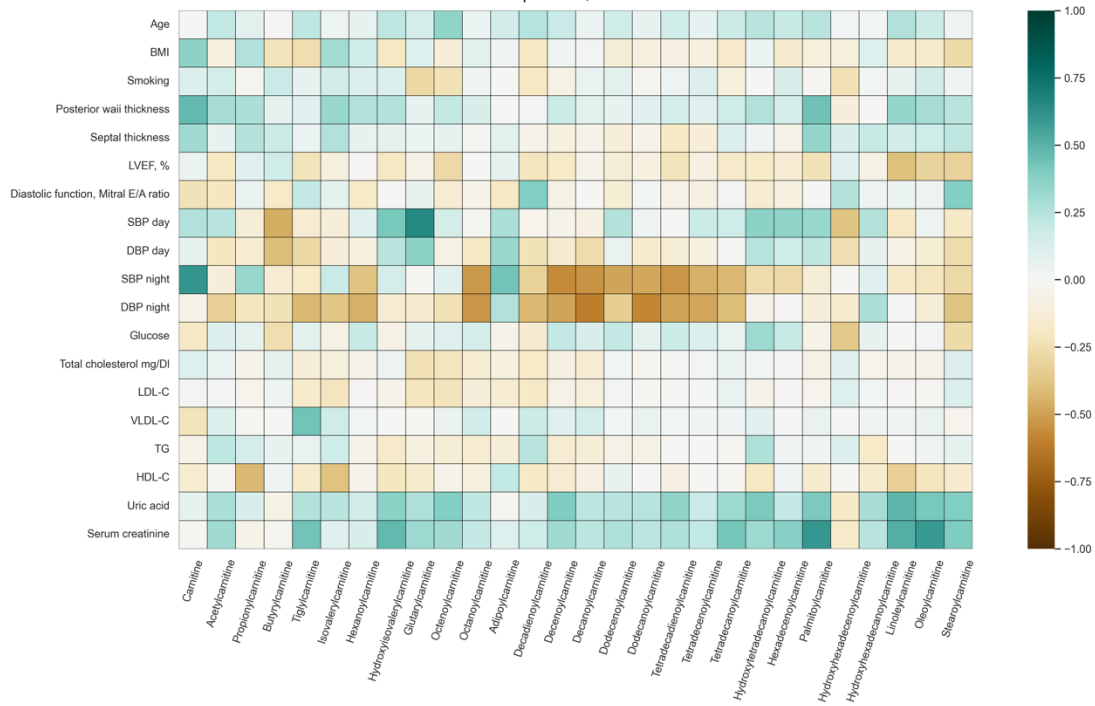

**Figure S2.** Heatmap correlations matrices between plasma metabolites related to amino acid profiling and cardiometabolic risk factors by participant groups: a. Non-CVD individuals; b. Patients with HTA; c. Patients with CAD.

A

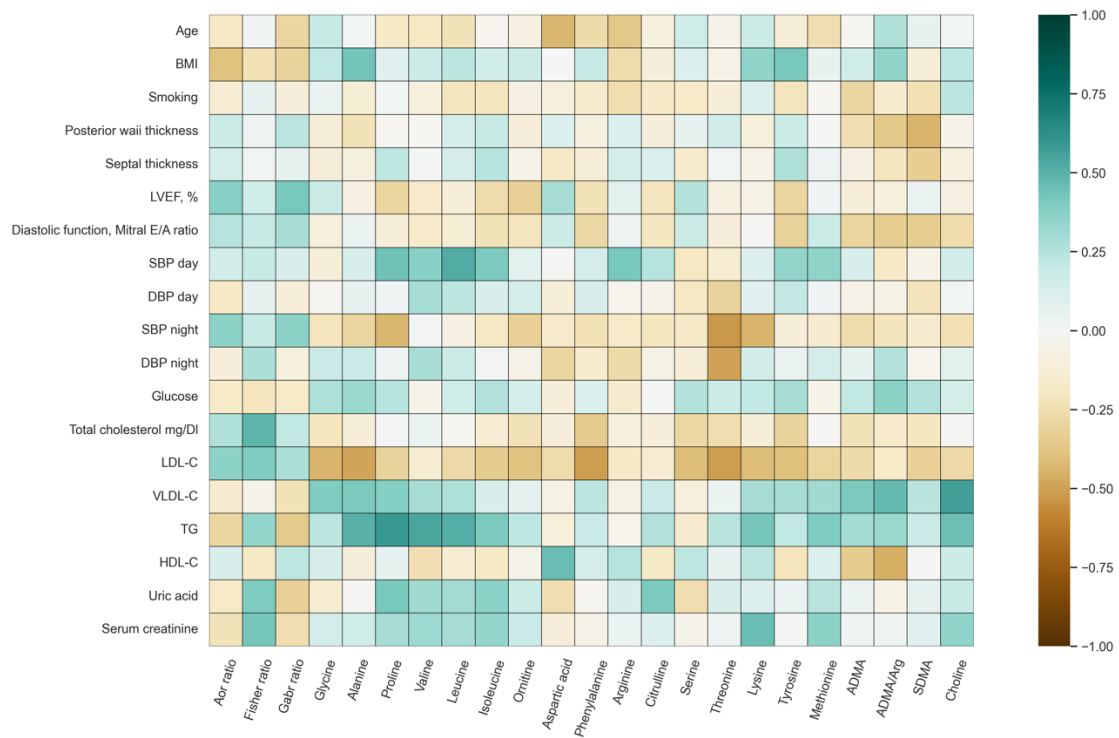



B

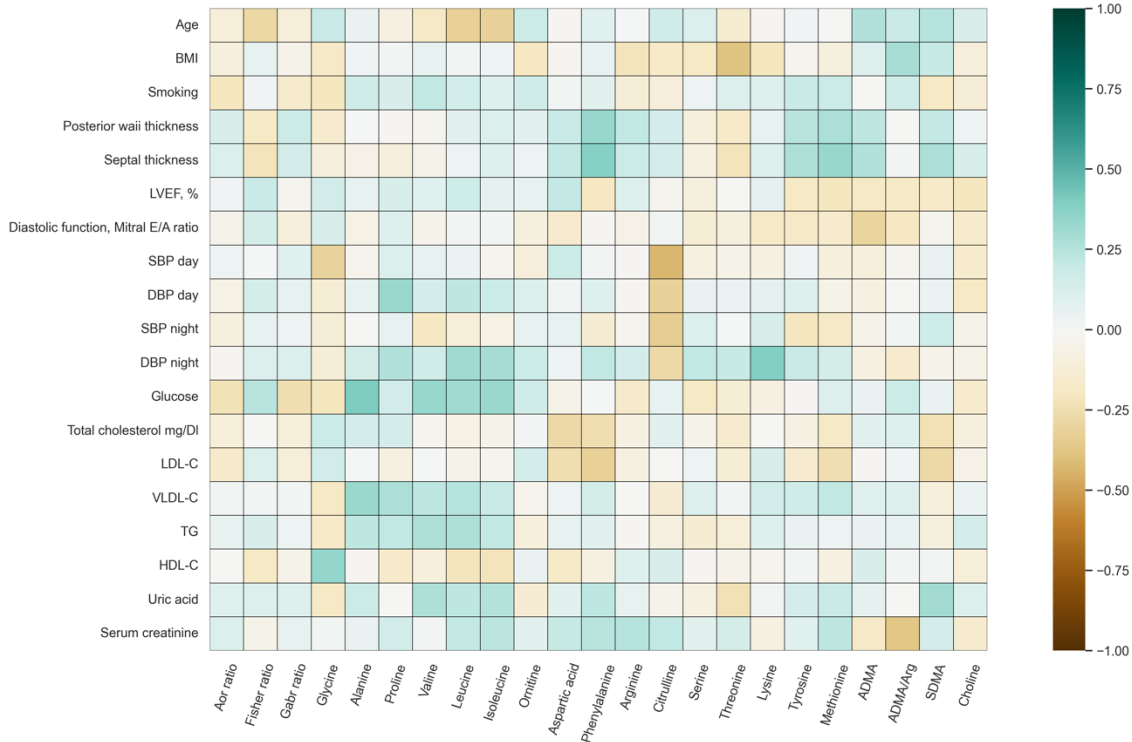

C

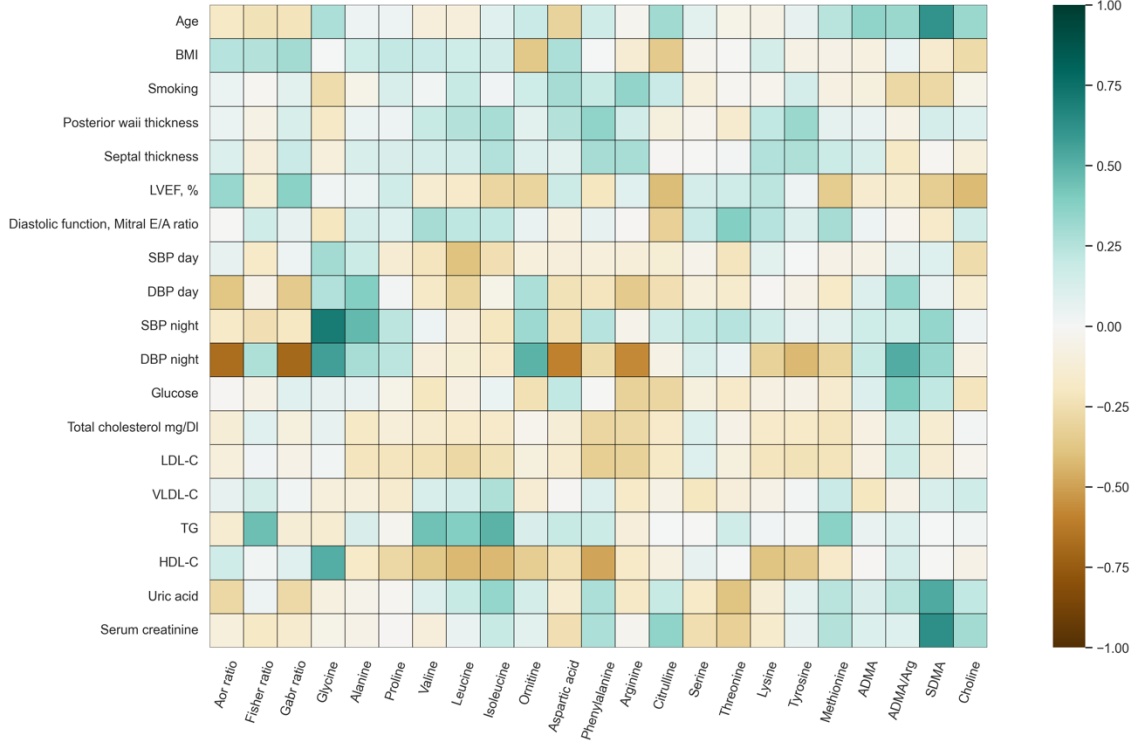

**Figure S3.** Heatmap correlations matrices between plasma metabolites related to tryptophan metabolism intermediates profiling and cardiometabolic risk factors by participant groups: a. Healthy individuals; b. Patients with HTA; c. Patients with CAD.

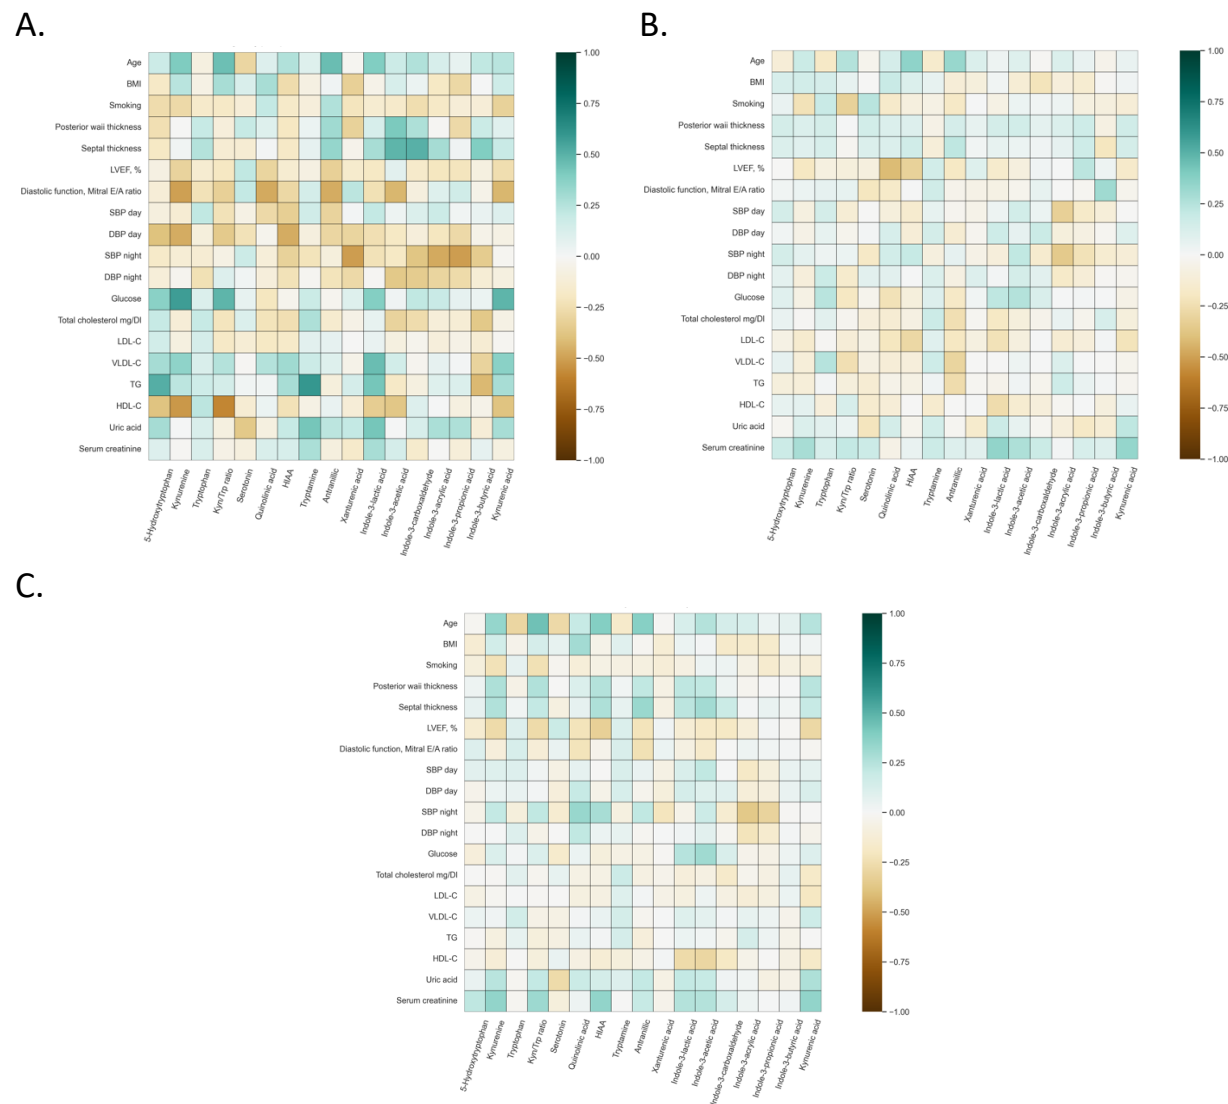

**Figure S4.** Principle component analysis of the three analyzed groups

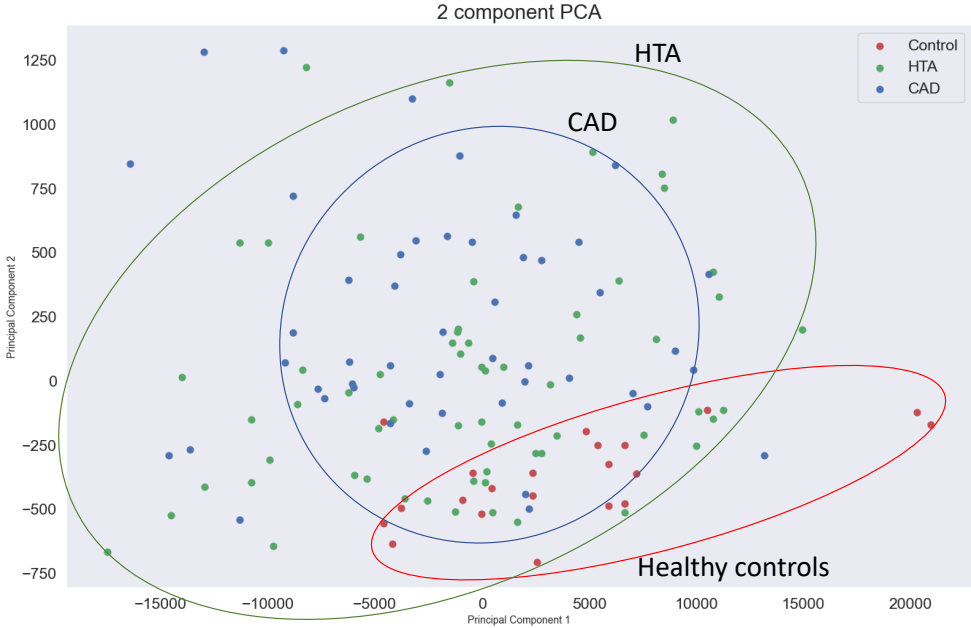

**Figure S5.** Error matixes of models developed using: A - SVC classifier; B – MLP classifier; C – Gradient boosting classifier.

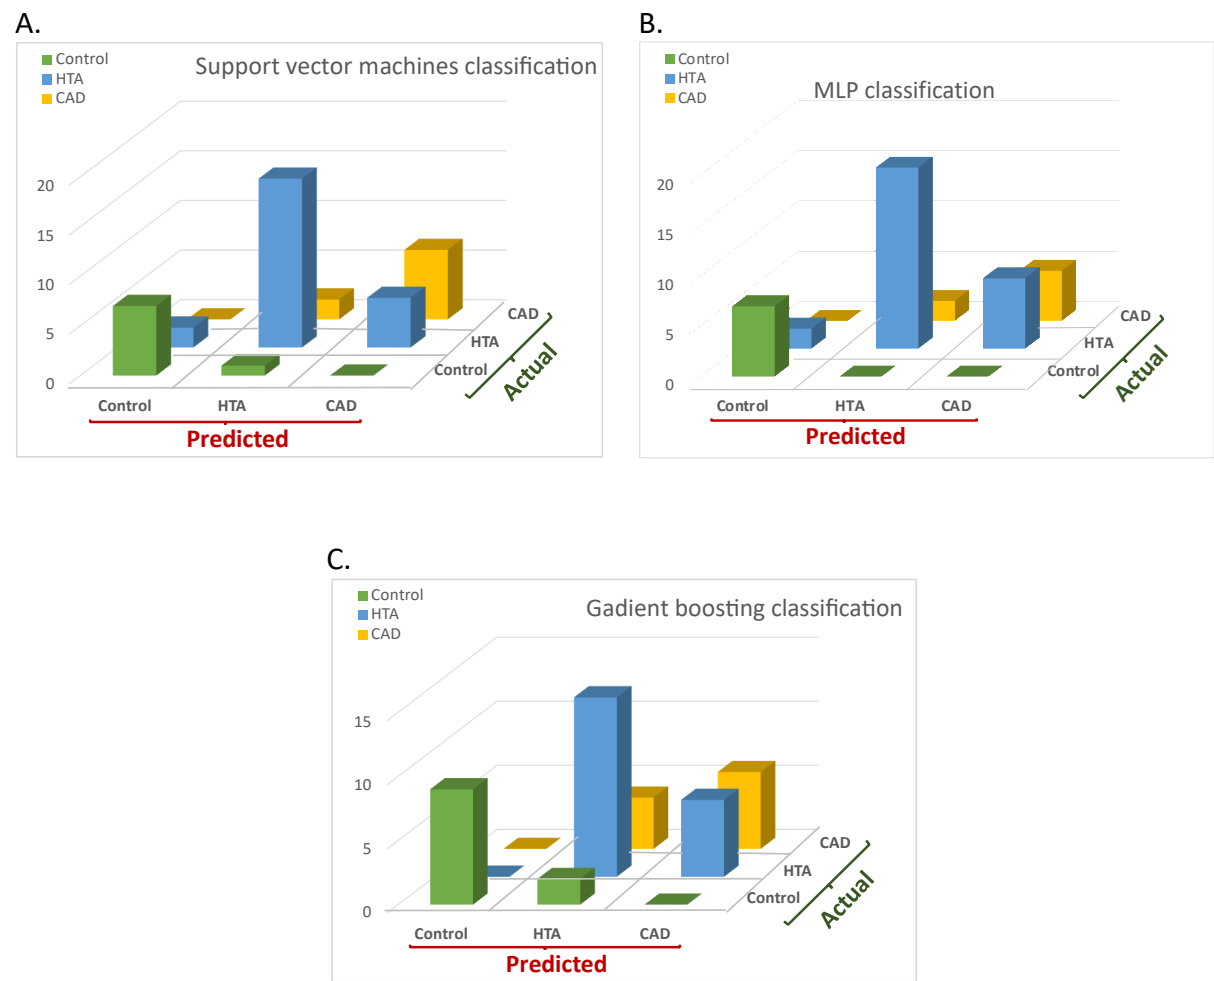

**Figure S6.** Plotted feature importance of the multiclass classifier

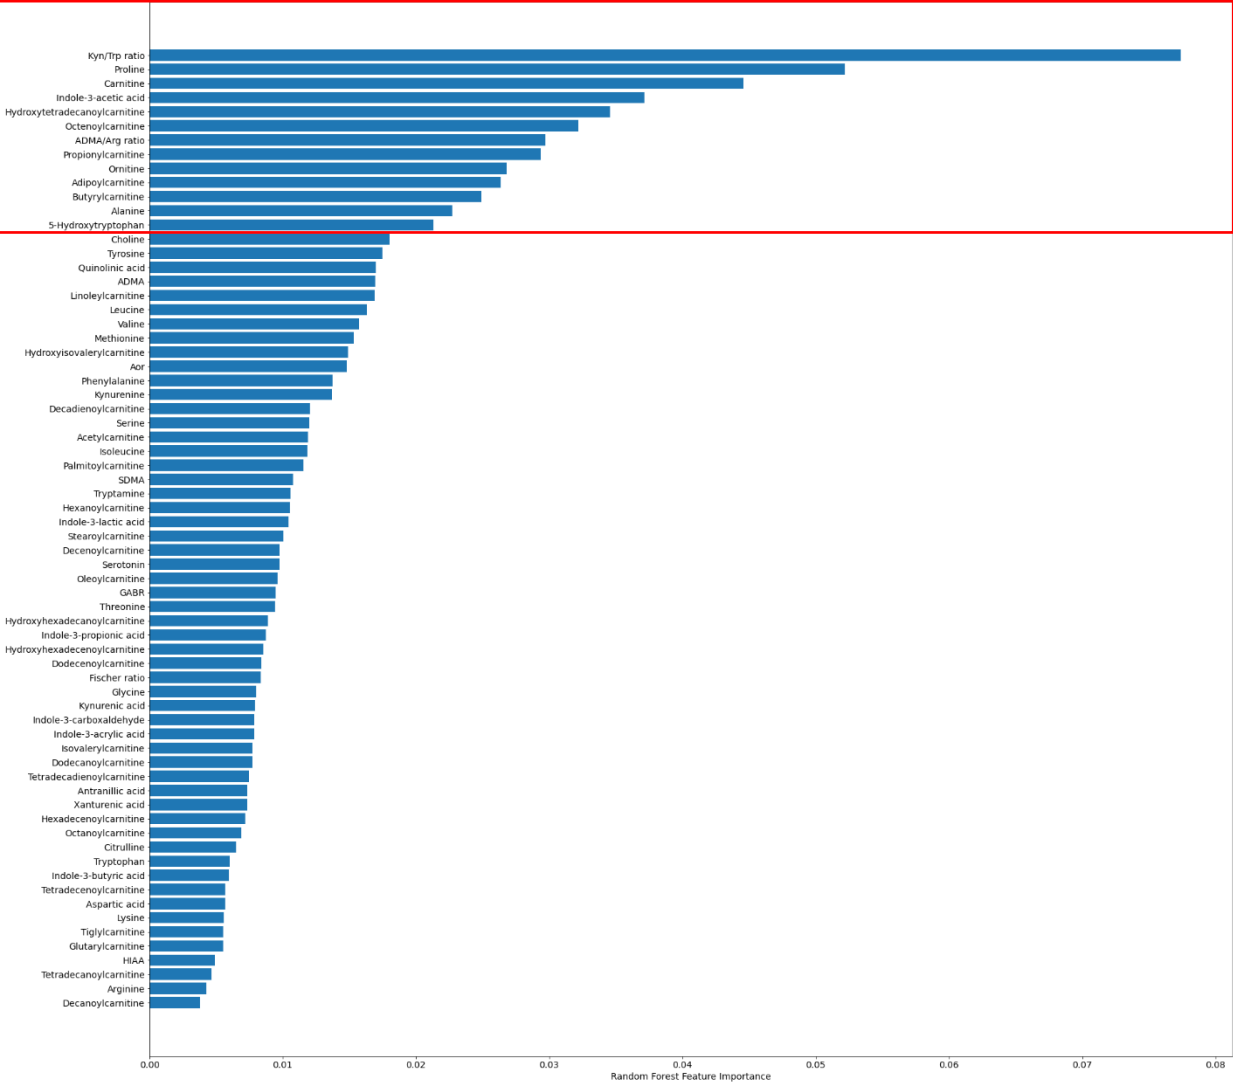

Supplement: s1 [file s1]
